# Supplementary material for: Ultrastructure of a Columbite-Tantalite Mineral from the Zhaojinggou Ta-Nb Deposit in the North China Craton: Direct Evidence of the Formation Mechanism of the Columbite-Group Minerals
Source: Hindawi journal article supplement (doi:10.1155/2022/8125419), 2022-12-03

Supplemental Files

Figure S1. A nanoscale hydrothermal channel existed between the columbite-group mineral and quartz.

Figure S2. Nanoscale hydrothermal channel within columbite-group mineral.

Figure S1


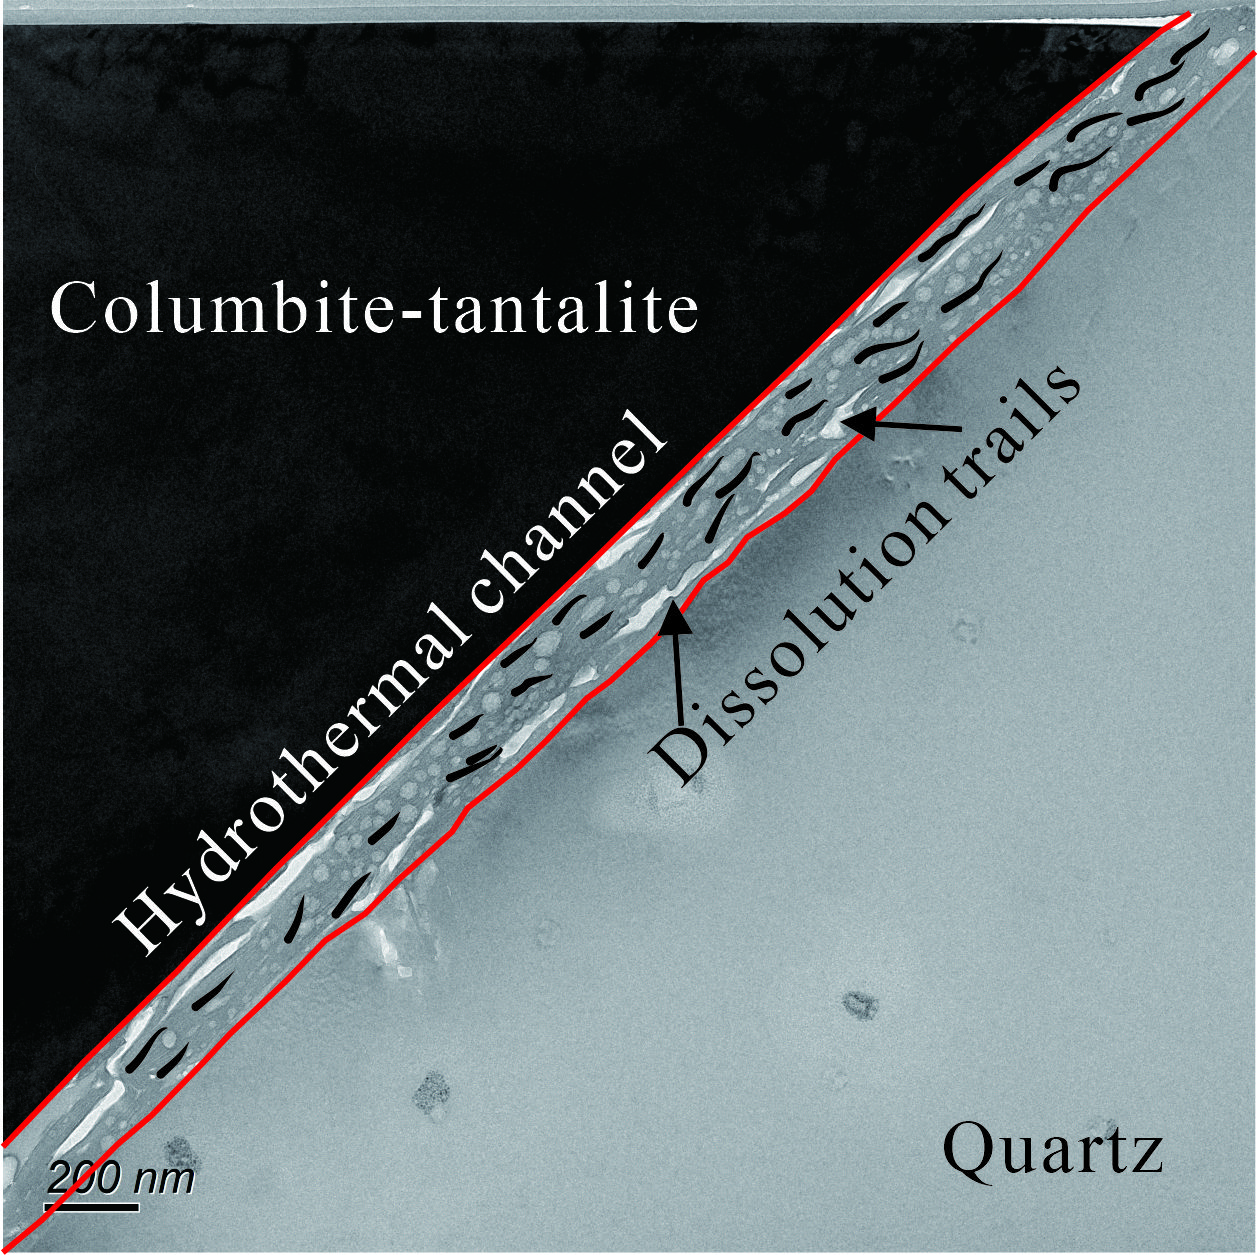


Figure S2


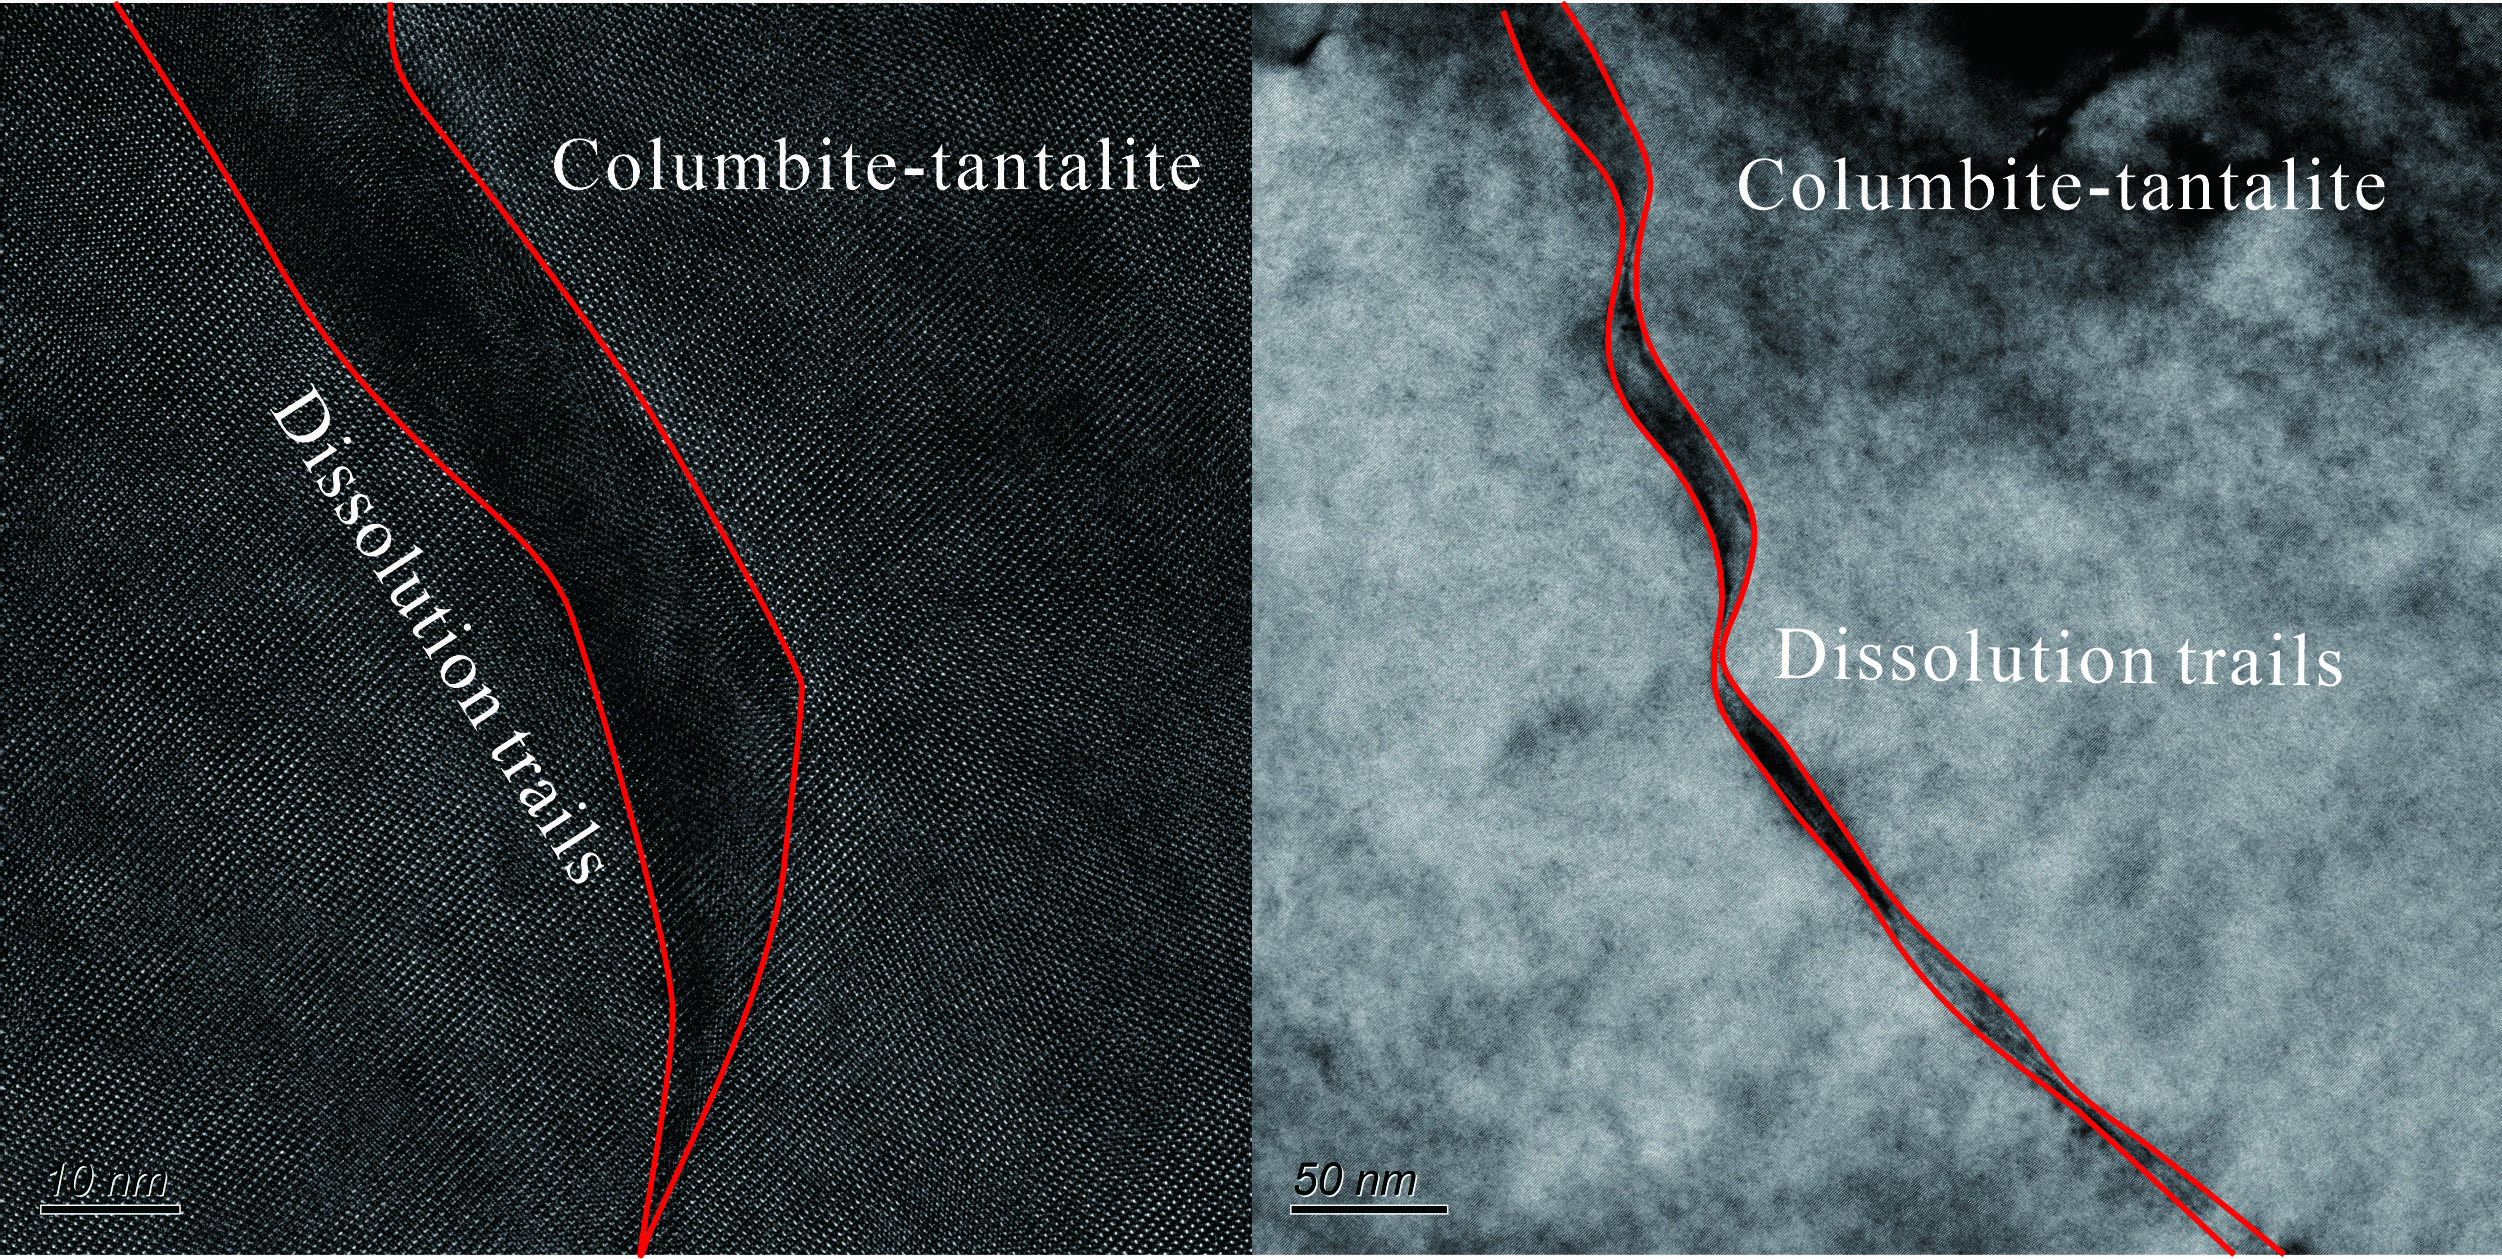

Supplement: f1 [file 8125419.f1.docx]
